# Supplementary material for: Cryo-electron tomographic investigation of native hippocampal glutamatergic synapses
Source: PubMed Central journal article supplement (PMC11534335; doi:10.7554/elife.98458), 2024-11-04

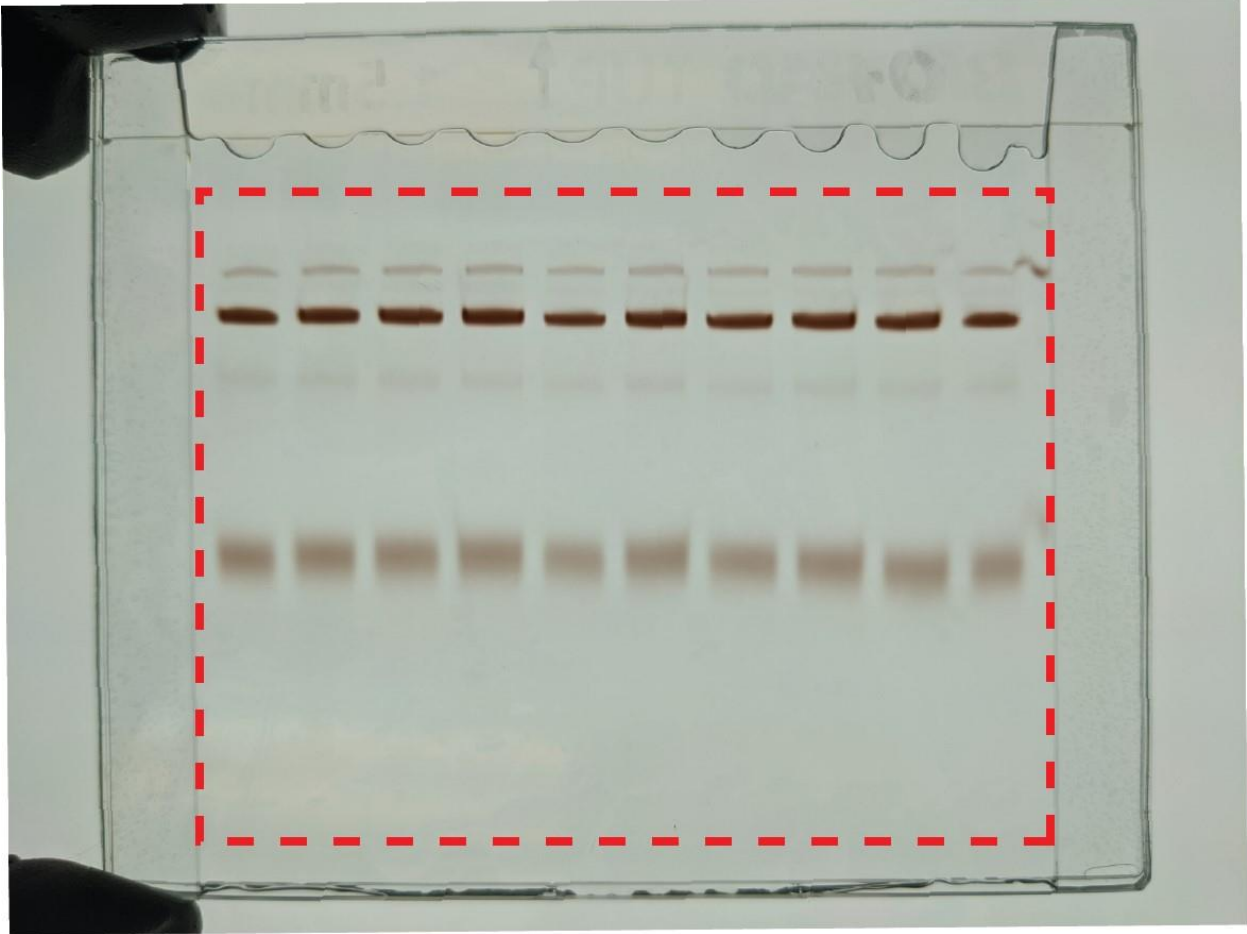

Supplement: elife-98458-fig1-figsupp1-data1.pdf [file elife-98458-fig1-figsupp1-data1.pdf]
